# Supplementary material for: Appraising the Genetic Makeup of an Allochthonous Southern Pike Population: An Opportunity to Predict the Evolution of Introgressive Hybridization in Isolated Populations?
Source: MDPI journal article supplement (doi:10.3390/ani13030380), 2023-01-22
Supplement: s1 [file s1]

# Appraising the Genetic Makeup of a Southern Pike Allochthonous Population: An Opportunity to Predict the Evolution of Introgressive Hybridization in Isolated Populations?

Marco Casu<sup>1</sup>, Ilenia Azzena<sup>1,2</sup>, Fabio Scarpa<sup>2</sup>, Chiara Locci<sup>1,2</sup>, Alessio Niffoi<sup>1</sup>, Giovanni B. Delmastro<sup>3</sup>, Paolo Lo Conte<sup>4</sup>, Antonio Varcasia<sup>1</sup>, Stefano Bovero<sup>5</sup>, Alessandro Candiotto<sup>6</sup>, Daria Sanna<sup>2</sup>, Piero Cossu<sup>1</sup>

<sup>1</sup>Department of Veterinary Medicine, University of Sassari, Sassari, Italy

<sup>2</sup>Department of Biomedical Sciences, University of Sassari, Sassari, Italy

<sup>3</sup>Laboratorio di Ittiologia, Museo Civico di Storia Naturale, Carmagnola, Italy

<sup>4</sup>Funzione Specializzata Tutela Fauna e Flora, Città Metropolitana di Torino, Torino, Italy

<sup>5</sup>Independent researcher “Zirichiltaggi” Sardinia Wildlife Conservation NGO, Sassari, Italia

<sup>6</sup>NaturaStaff Hydrobiologist, Mongardino, Italy

Corresponding author:

Piero Cossu

Department of Veterinary Medicine, Via Vienna 2, 07100, Sassari, Italy

Phone: +39 079 2280924

Email: [picossu@uniss.it](mailto:picossu@uniss.it)

**Table S1.** Microsatellite loci used in this study

| Locus   | Repeat motif  | Number<br>alleles | of | Allele size range | GenBank<br>accession number |
|---------|---------------|-------------------|----|-------------------|-----------------------------|
| EmaB120 | (AC)14        | 5                 |    | 227 - 235         | EU108731.1                  |
| B457    | (TCTA)9       | 17                |    | 159 - 335         | AF520603.1                  |
| Elu19   | (AC)23AG(AC)3 | 20                |    | 122 - 172         | BV012656.1                  |
| Elu78   | (CA)13        | 9                 |    | 125 - 143         | BV012653.1                  |
| B259    | (CTAT)8       | 7                 |    | 276 - 304         | AF520598.1                  |
| EluB38  | (TG)11        | 6                 |    | 169 - 179         | AY185339.1                  |
| Eluc027 | (CA)10        | 9                 |    | 140 - 164         | GQ358212.1                  |
| Elu76   | (AC)17        | 15                |    | 145 - 193         | BV012657.1                  |
| Elu87   | (AC)20        | 9                 |    | 132 - 148         | BV012654.1                  |
| Eluc040 | (CA)16        | 8                 |    | 227 - 249         | GQ358218.1                  |
| Eluc046 | (CA)23        | 10                |    | 180 - 208         | GQ358222.1                  |

**Table S2.** Summary statistics of within population genetic variation for each locus and population of *Esox cisalpinus* and *Esox lucius*.

|                         | EmaB120 | B457    | Elu19   | Elu78   | B259    | EluB38  | Eluc027 | Elu76   | Elu87   | Eluc040 | Eluc046 |
|-------------------------|---------|---------|---------|---------|---------|---------|---------|---------|---------|---------|---------|
| FLU                     |         |         |         |         |         |         |         |         |         |         |         |
| <i>A</i>                | 4       | 6       | 6       | 6       | 2       | 4       | 6       | 4       | 5       | 2       | 7       |
| <i>A<sub>R</sub></i>    | 4       | 4.92    | 4.67    | 5.29    | 1.99    | 3.16    | 4.99    | 3.3     | 3.82    | 2       | 4.87    |
| <i>H<sub>O</sub></i>    | 0.71    | 0.55    | 0.47    | 0.83    | 0.24    | 0.38    | 0.71    | 0.62    | 0.84    | 0.52    | 0.79    |
| <i>H<sub>E</sub></i>    | 0.74    | 0.68    | 0.53    | 0.76    | 0.21    | 0.33    | 0.72    | 0.59    | 0.68    | 0.49    | 0.66    |
| <i>F<sub>IS</sub></i>   | 0.0405  | 0.1923  | 0.1168  | -0.0877 | -0.1373 | -0.1362 | 0.0174  | -0.058  | -0.249  | -0.0545 | -0.2021 |
| <i>F<sub>IS</sub>_L</i> | -0.1065 | 0.0306  | -0.072  | -0.2013 | -0.2196 | -0.246  | -0.1352 | -0.2692 | -0.3753 | -0.3096 | -0.3077 |
| <i>F<sub>IS</sub>_H</i> | 0.1978  | 0.3568  | 0.316   | 0.0383  | -0.0727 | -0.009  | 0.1829  | 0.1516  | -0.1101 | 0.2037  | -0.0915 |
| TRA                     |         |         |         |         |         |         |         |         |         |         |         |
| <i>A</i>                | 3       | 8       | 7       | 4       | 2       | 2       | 2       | 1       | 3       | 2       | 2       |
| <i>A<sub>R</sub></i>    | 2.66    | 5.97    | 6.48    | 3.51    | 2       | 1.63    | 2       | 1       | 2.99    | 2       | 1.62    |
| <i>H<sub>O</sub></i>    | 0.6     | 0.4     | 0.8     | 0.55    | 0.6     | 0.05    | 0.9     | 0       | 0.5     | 0.7     | 0.05    |
| <i>H<sub>E</sub></i>    | 0.52    | 0.39    | 0.78    | 0.52    | 0.48    | 0.05    | 0.49    | 0       | 0.46    | 0.49    | 0.05    |
| <i>F<sub>IS</sub></i>   | -0.1622 | -0.0224 | -0.0273 | -0.0654 | -0.25   | -0.0256 | -0.8182 | #N/D    | -0.087  | -0.4141 | -0.0256 |
| <i>F<sub>IS</sub>_L</i> | -0.5289 | -0.1879 | -0.2123 | -0.3674 | -0.5949 | -0.0957 | -0.995  | #N/D    | -0.3546 | -0.779  | -0.0956 |
| <i>F<sub>IS</sub>_H</i> | 0.2478  | 0.1958  | 0.1752  | 0.2709  | 0.1879  | -0.0103 | -0.595  | #N/D    | 0.2841  | 0.0109  | -0.0102 |
| CAR                     |         |         |         |         |         |         |         |         |         |         |         |
| <i>A</i>                | 2       | 5       | 9       | 3       | 2       | 4       | 4       | 2       | 4       | 4       | 7       |
| <i>A<sub>R</sub></i>    | 1.95    | 4.4     | 6.68    | 2.9     | 2       | 3.27    | 3.3     | 1.52    | 3.38    | 3.98    | 6.12    |
| <i>H<sub>O</sub></i>    | 0.14    | 0.57    | 0.5     | 0.54    | 0.29    | 0.57    | 0.54    | 0.04    | 0.21    | 0.68    | 0.71    |
| <i>H<sub>E</sub></i>    | 0.13    | 0.46    | 0.52    | 0.55    | 0.29    | 0.55    | 0.42    | 0.04    | 0.31    | 0.67    | 0.65    |
| <i>F<sub>IS</sub></i>   | -0.0769 | -0.2393 | 0.0416  | 0.0244  | 0.0261  | -0.0407 | -0.2864 | -0.0182 | 0.3129  | -0.0143 | -0.1024 |
| <i>F<sub>IS</sub>_L</i> | -0.1639 | -0.3508 | -0.1223 | -0.2971 | -0.2488 | -0.3632 | -0.4414 | -0.0665 | -0.0994 | -0.2206 | -0.2771 |
| <i>F<sub>IS</sub>_H</i> | -0.0154 | -0.1439 | 0.2068  | 0.3521  | 0.4525  | 0.2795  | -0.1614 | -0.0077 | 0.7442  | 0.2078  | 0.0977  |
| DRA                     |         |         |         |         |         |         |         |         |         |         |         |
| <i>A</i>                | 4       | 2       | 13      | 2       | 5       | 3       | 6       | 11      | 6       | 6       | 3       |
| <i>A<sub>R</sub></i>    | 3.84    | 1.87    | 11.1    | 1.6     | 4.19    | 2.61    | 5.38    | 9.37    | 5.8     | 5.23    | 2.46    |
| <i>H<sub>O</sub></i>    | 0.55    | 0.09    | 1       | 0.05    | 0.41    | 0.23    | 0.82    | 0.73    | 0.68    | 0.41    | 0.14    |
| <i>H<sub>E</sub></i>    | 0.55    | 0.09    | 0.89    | 0.04    | 0.44    | 0.21    | 0.63    | 0.85    | 0.8     | 0.66    | 0.13    |
| <i>F<sub>IS</sub></i>   | 0.0094  | -0.0476 | -0.1269 | -0.0233 | 0.0769  | -0.1055 | -0.3069 | 0.1425  | 0.1473  | 0.3783  | -0.056  |
| <i>F<sub>IS</sub>_L</i> | -0.2815 | -0.1204 | -0.1832 | -0.0597 | -0.1819 | -0.2159 | -0.4409 | -0.0459 | -0.098  | 0.0966  | -0.127  |
| <i>F<sub>IS</sub>_H</i> | 0.3398  | -0.0155 | -0.0902 | -0.0098 | 0.4158  | -0.029  | -0.1605 | 0.3501  | 0.3891  | 0.6607  | -0.0149 |

Abbreviations: *A* = Number of alleles; *A<sub>R</sub>* = Allelic richness; *H<sub>O</sub>* = Observed heterozygosity; *H<sub>E</sub>* = Expected heterozygosity; *F<sub>IS</sub>* = Inbreeding coefficient; *F<sub>IS</sub>\_L* = 95% confidence interval lower limit of inbreeding coefficient; *F<sub>IS</sub>\_H* = 95% confidence interval upper limit of inbreeding coefficient. FLU = Alto Flumnedosa Lake; TRA = Trasimenp Lake; CAR = Carignano-La loggia; DRA = Drava River

**Table S3.** Pairwise population differentiation estimated using Jost's  $D_{\text{EST}}$ . Observed values are reported below the diagonal. Lower and upper limits of 95% confidence intervals based on 10'000 bootstraps are reported within brackets above the diagonal. Populations are abbreviated as in Table S2

|     | FLU   | TRA            | CAR            | DRA            |
|-----|-------|----------------|----------------|----------------|
| FLU | —     | (0.141, 0.230) | (0.203, 0.291) | (0.412, 0.505) |
| TRA | 0.184 | —              | (0.196, 0.287) | (0.387, 0.464) |
| CAR | 0.245 | 0.239          | —              | (0.532, 0.650) |
| DRA | 0.457 | 0.424          | 0.586          | —              |

**Table S4.** Range size distribution of 70 southern pikes caught in Alto Flumendosa Lake during the period 2014-2020

| Class size (cm) | Frequency |
|-----------------|-----------|
| 0 - 10          | 0         |
| 11 - 20         | 0         |
| 21 - 30         | 3         |
| 31 - 40         | 2         |
| 41 - 50         | 11        |
| 51 - 60         | 12        |
| 61 - 70         | 9         |
| 71 - 80         | 7         |
| 81 - 90         | 10        |
| 91 - 100        | 6         |
| 101 - 110       | 5         |
| 111 - 120       | 4         |
| > 120           | 1         |
